# Supplementary material for: Impaired reward prediction error encoding and striatal-midbrain connectivity in depression
Source: PubMed Central journal article supplement (PMC5983542; doi:10.1038/s41386-018-0032-x), 2018-02-26

### Gain trial

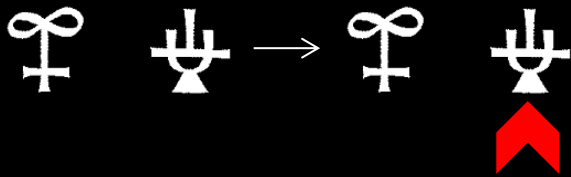

Cue presentation and selection – 2.5s

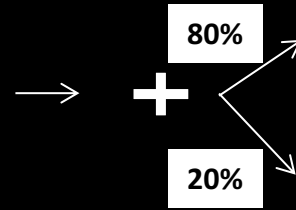

ISI (Jitter) - 0.5 -5.5s

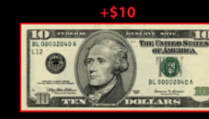

OR

Nothing

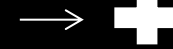

Feedback – 1.5s

ITI (Fixed)- 0.5s

### Loss trial

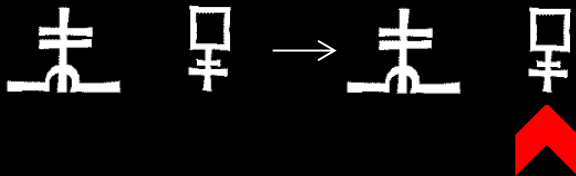

Cue presentation and selection – 2.5s

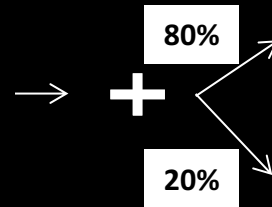

ISI (Jitter) - 0.5 -5.5s

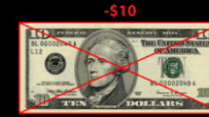

OR

Nothing

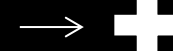

Feedback – 1.5s

ITI (Fixed)- 0.5s

### Neutral trial

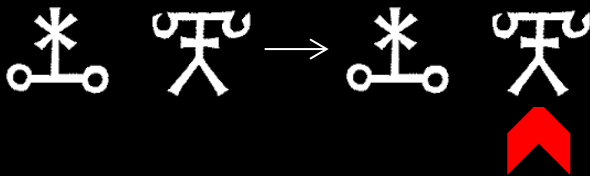

Cue presentation and selection – 2.5s

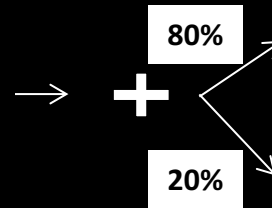

ISI (Jitter) - 0.5 -5.5s

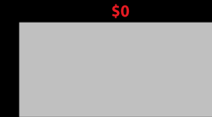

OR

Nothing

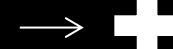

Feedback – 1.5s

ITI (Fixed)- 0.5s

A. Striatal ROIs

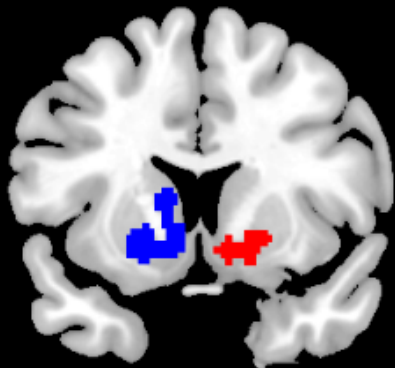

B. Ventral Tegmental Area

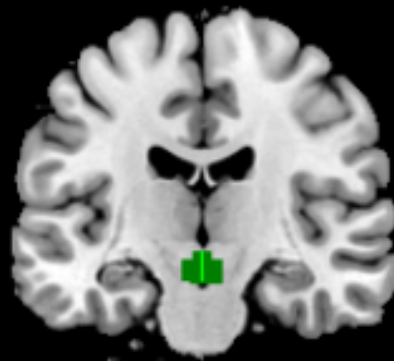

C. Habenula

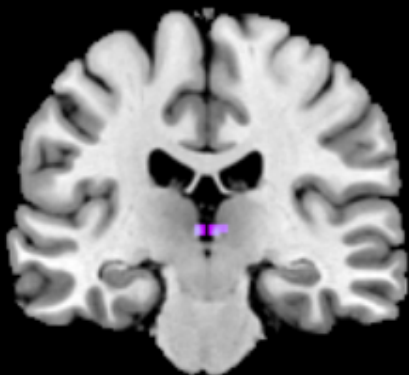

D. Right Insula

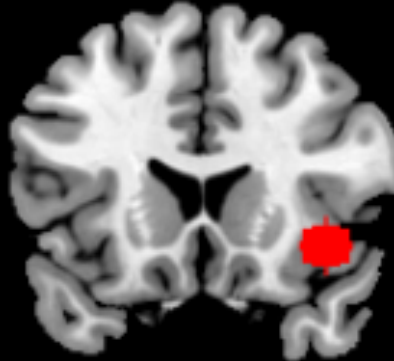

**A. Reward Prediction Error – Healthy Controls  
Group Fixed Learning Rate**

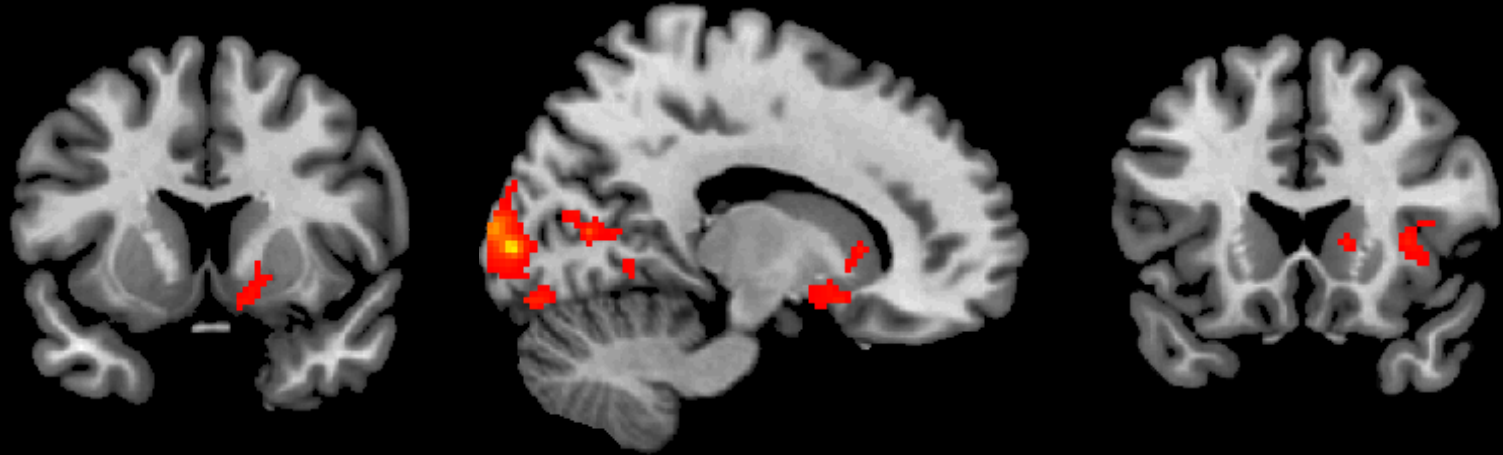

**B. Reward Prediction Error – MDD  
Group Fixed Learning Rate**

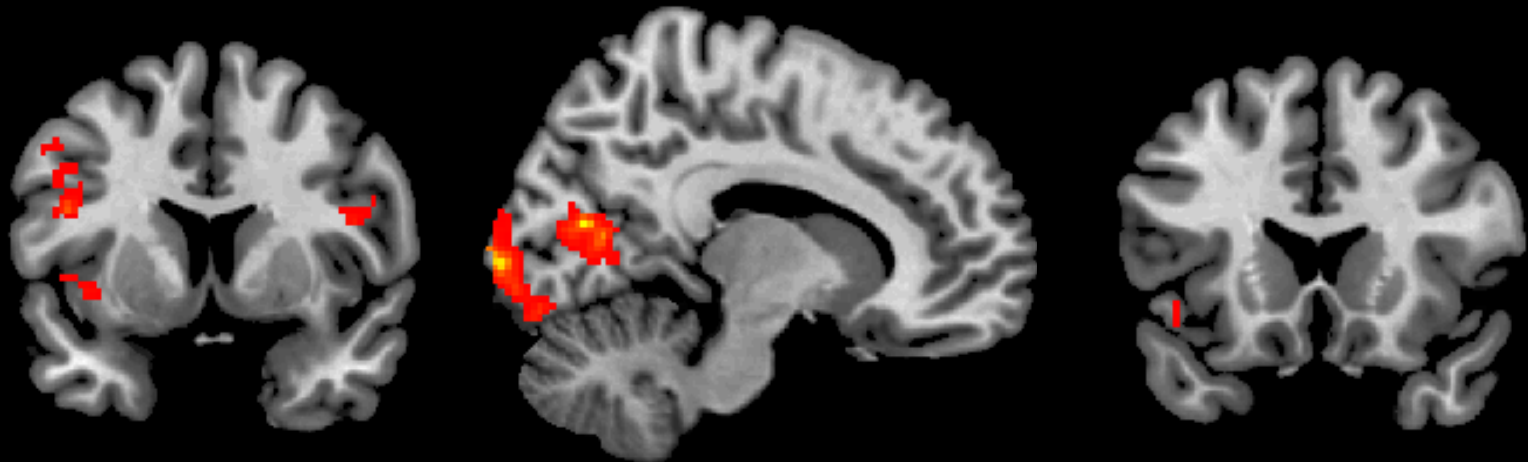

**A. Punishment Prediction Error – Healthy Controls  
Group Fixed Learning Rate**

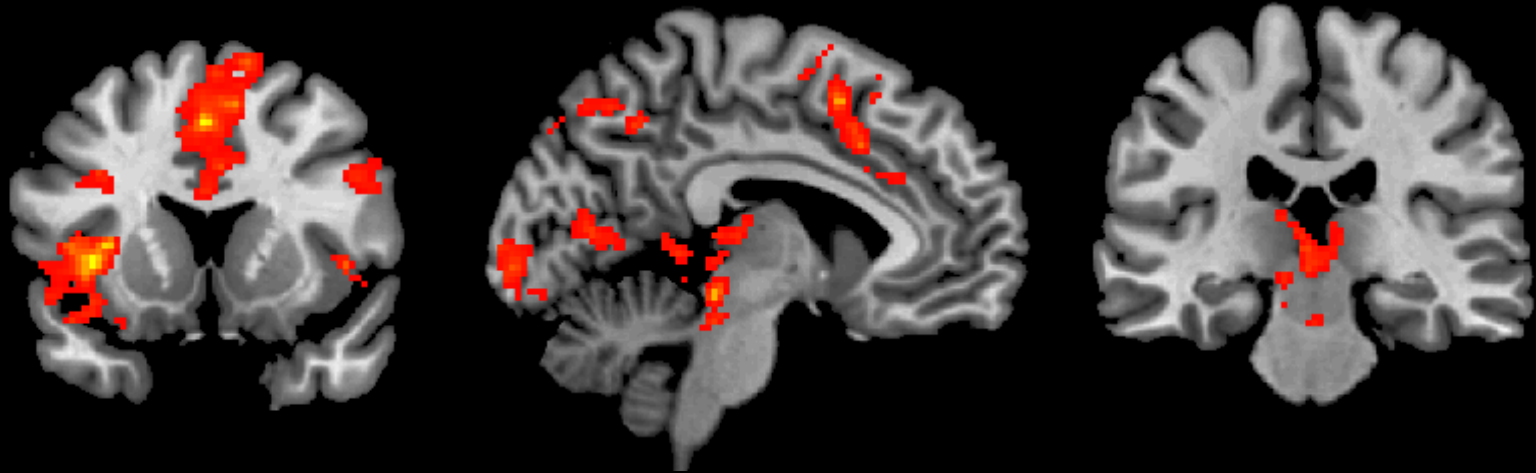

**B. Punishment Prediction Error – MDD  
Group Fixed Learning Rate**

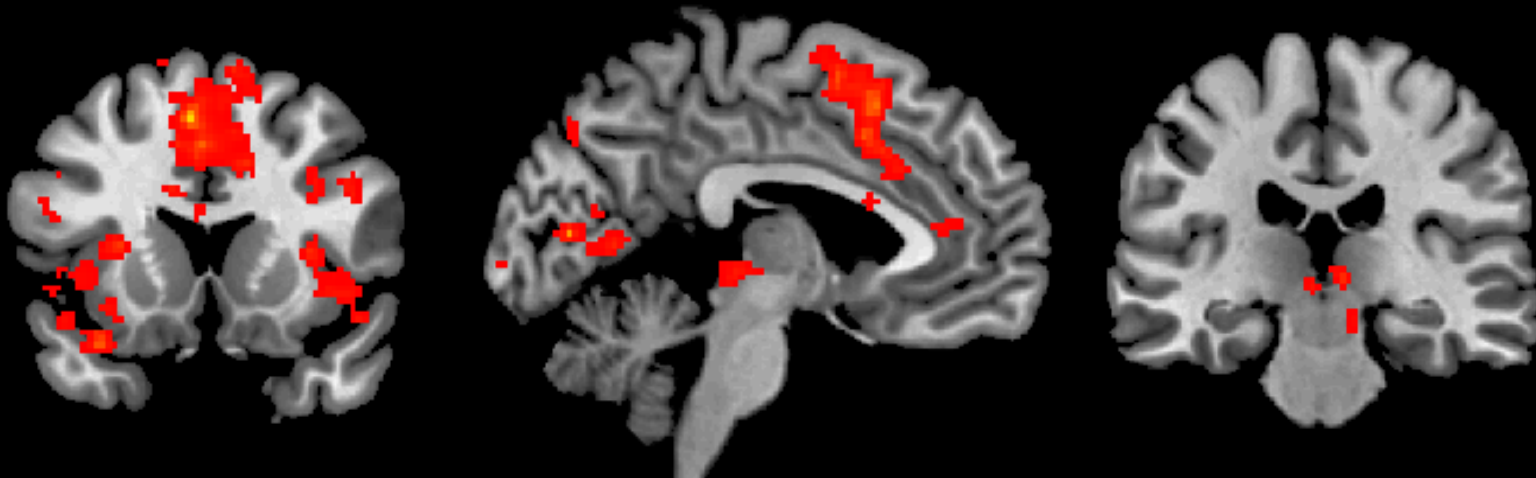

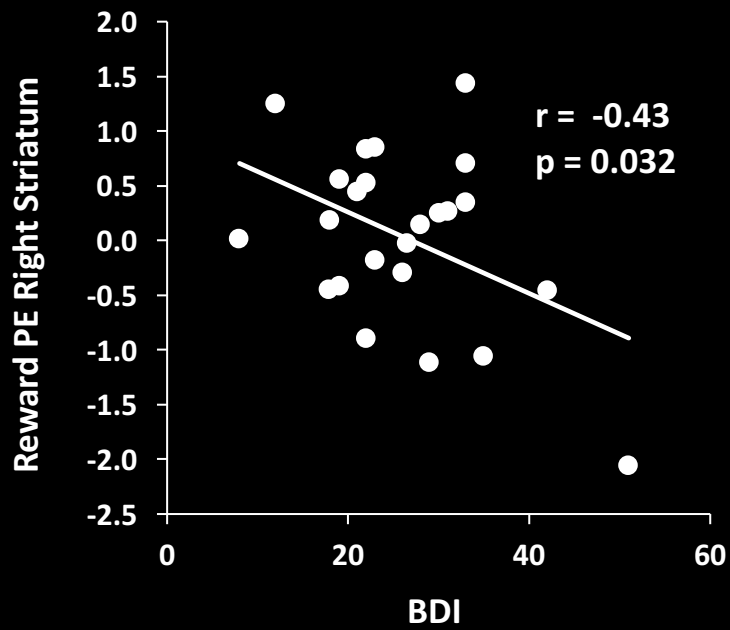

**A. RPE Right Striatum and Number of Episodes**

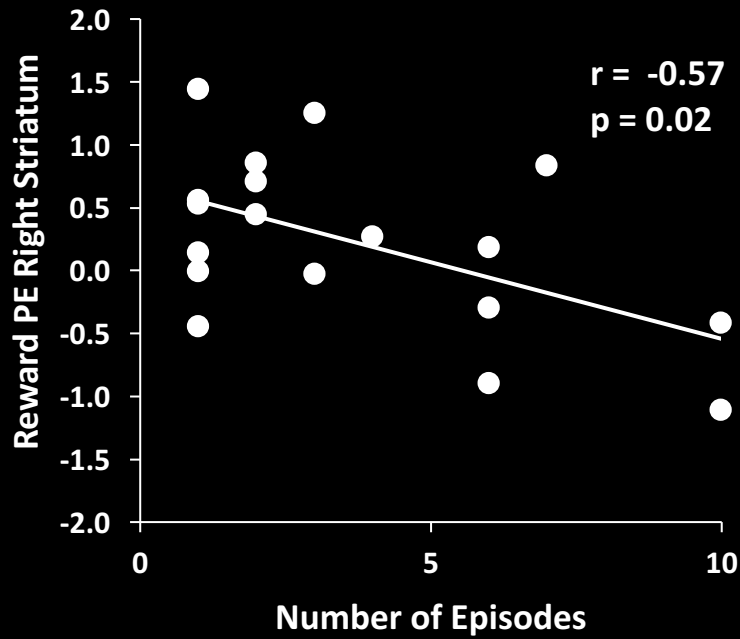

**B. PPE Habenula and Number of Episodes**

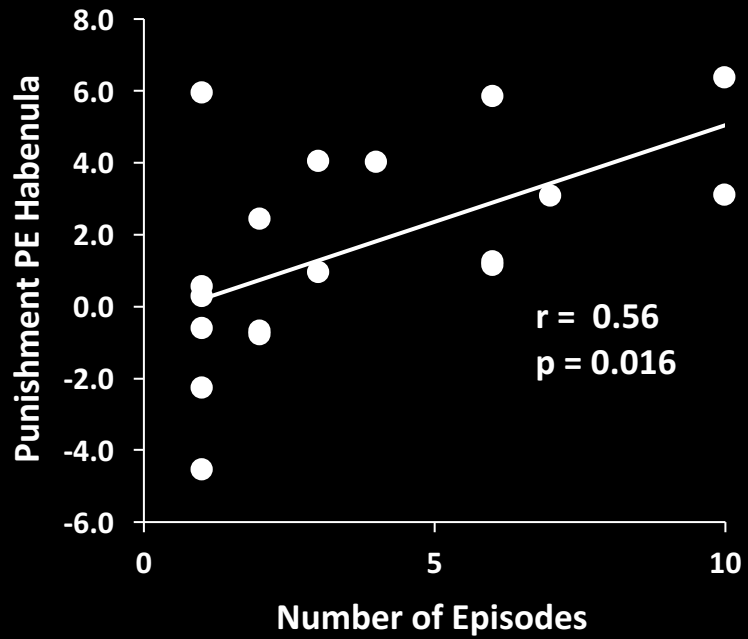

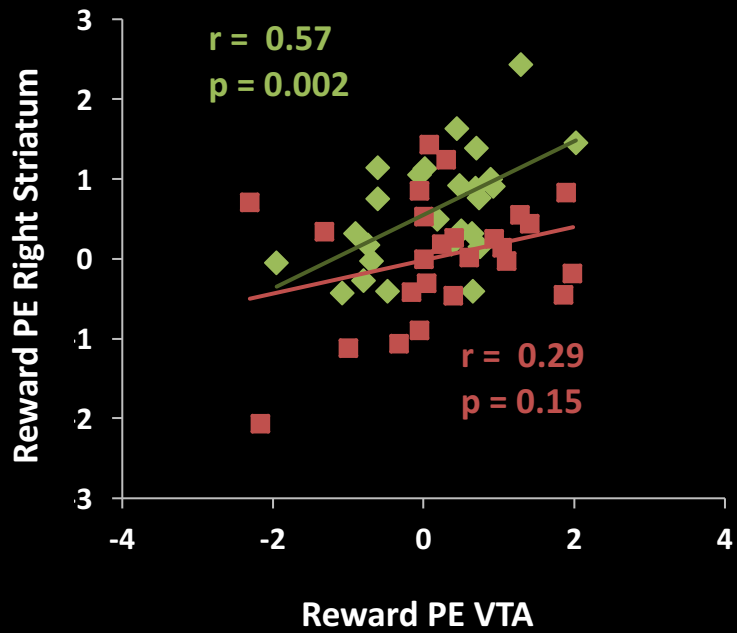

■ MDD    ◆ Controls

A. Right Striatum HC RPE

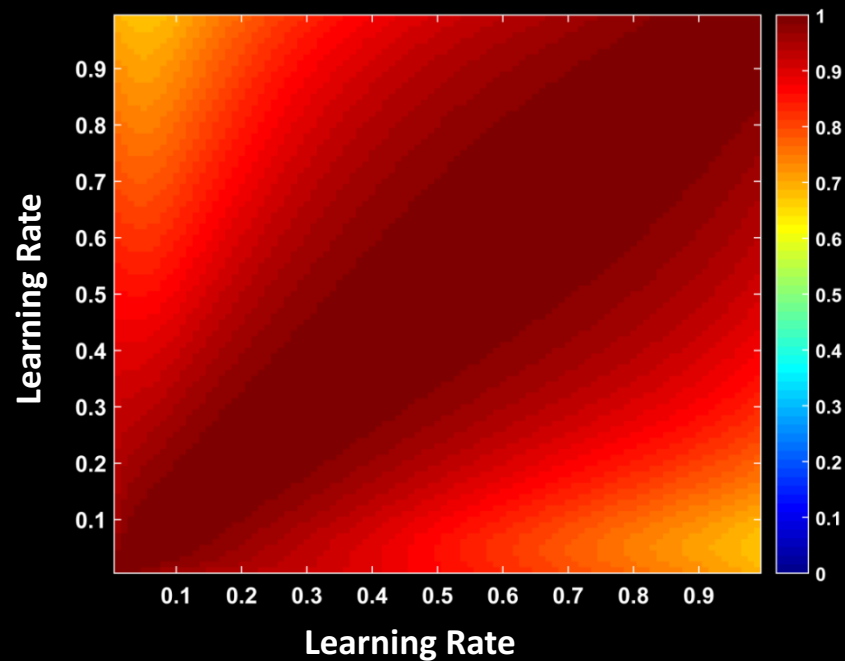

B. Right Striatum MDD RPE

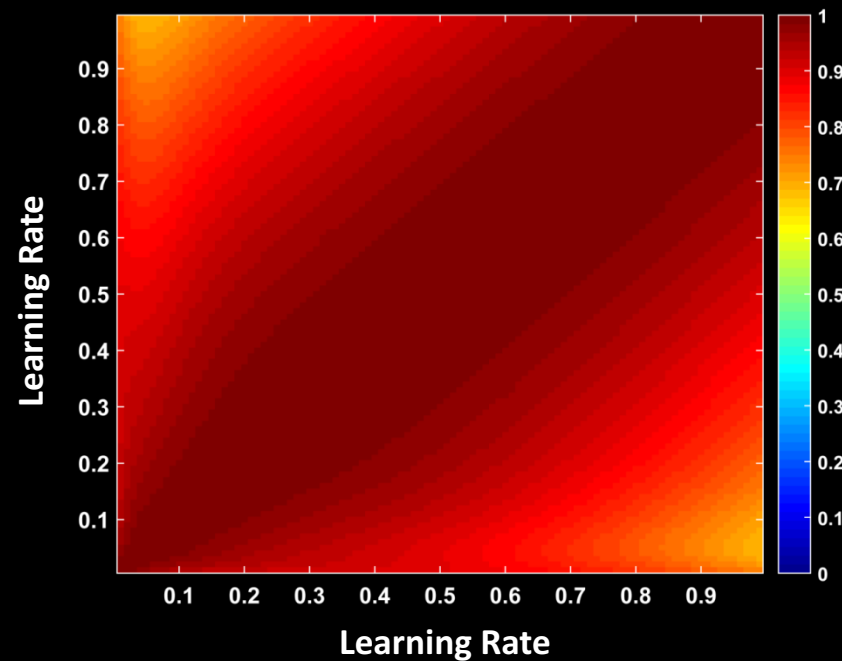

C. Right Striatum HC PPE

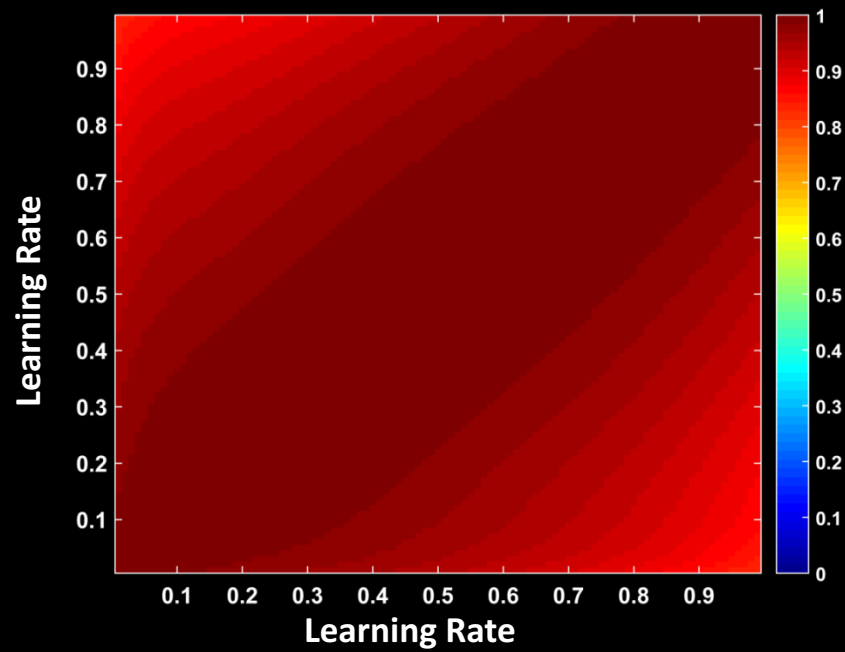

D. Right Striatum MDD PPE

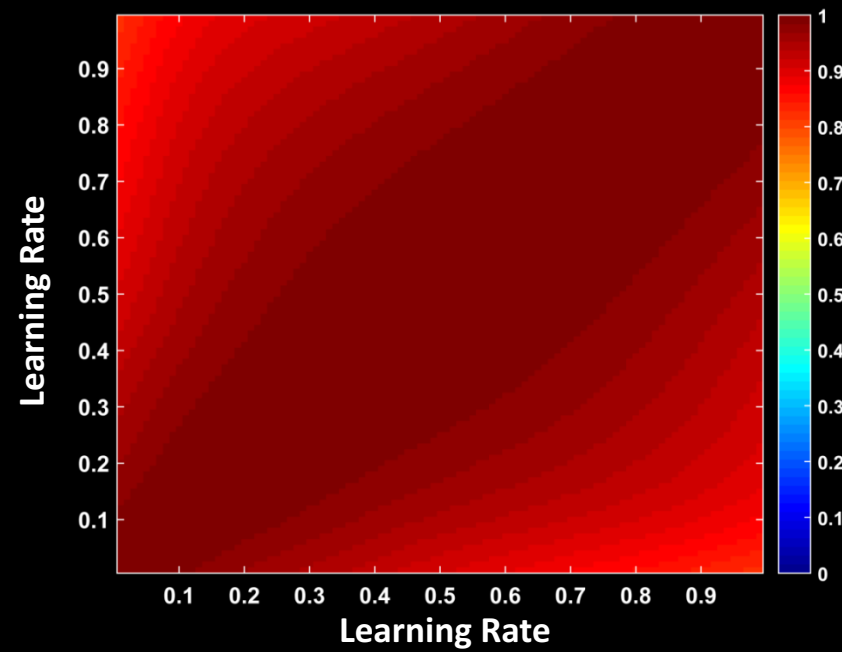



A. Right Insula HC RPE

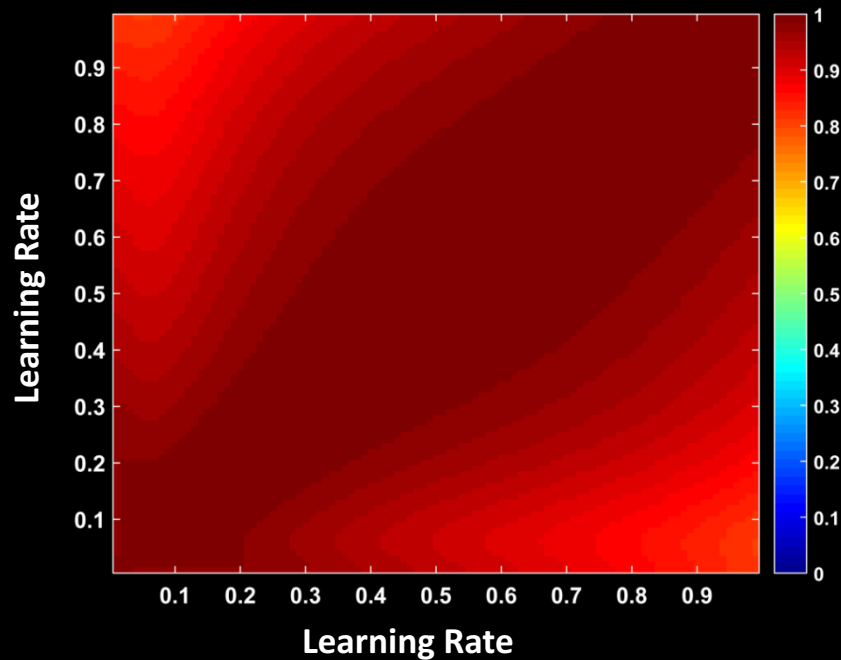

B. Right Insula MDD RPE

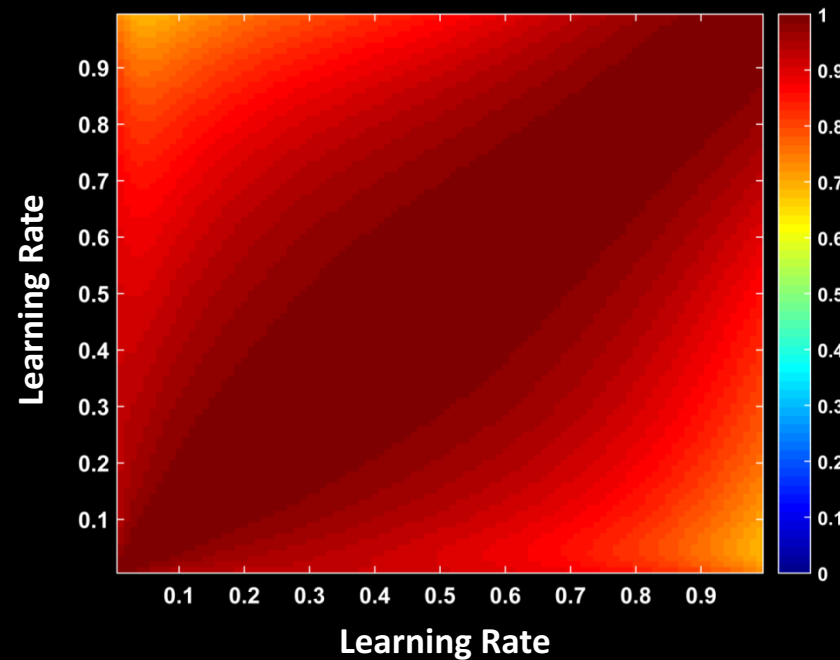

C. Right Insula HC PPE

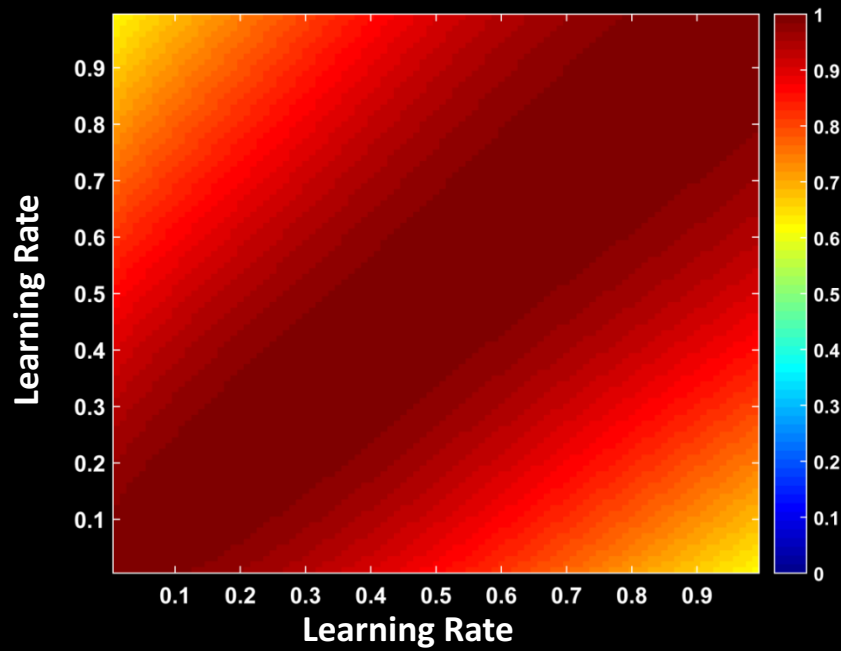

D. Right Insula MDD PPE

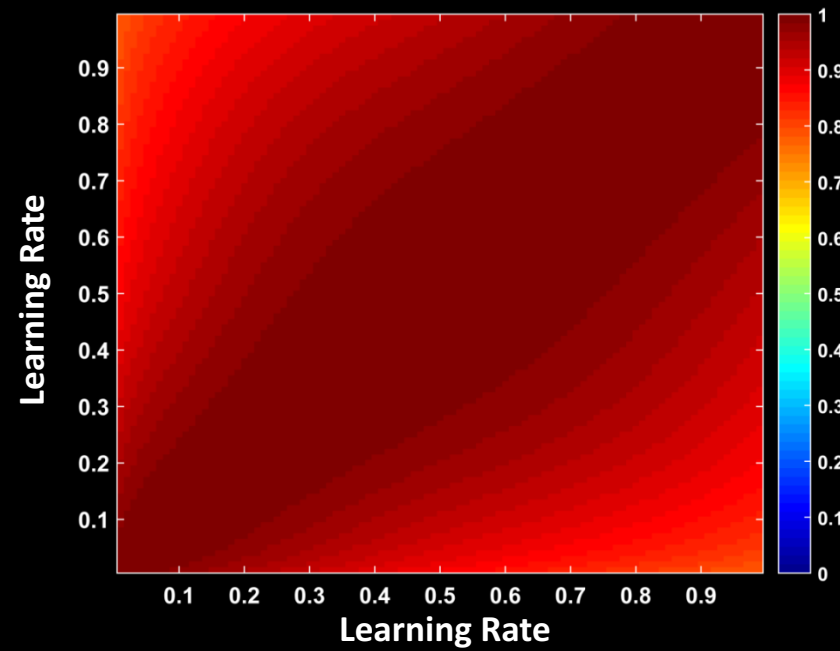

A. VTA HC RPE

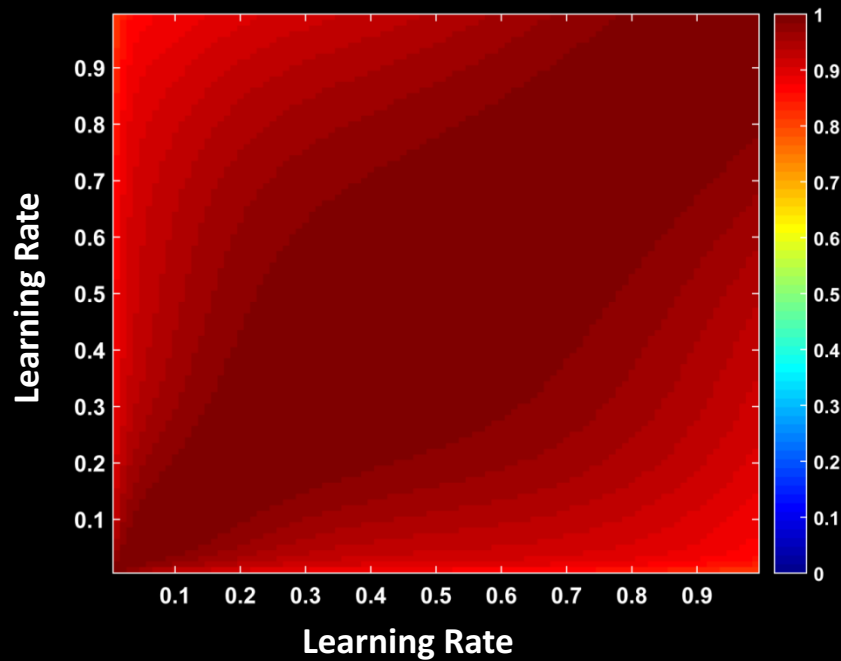

B. VTA MDD RPE

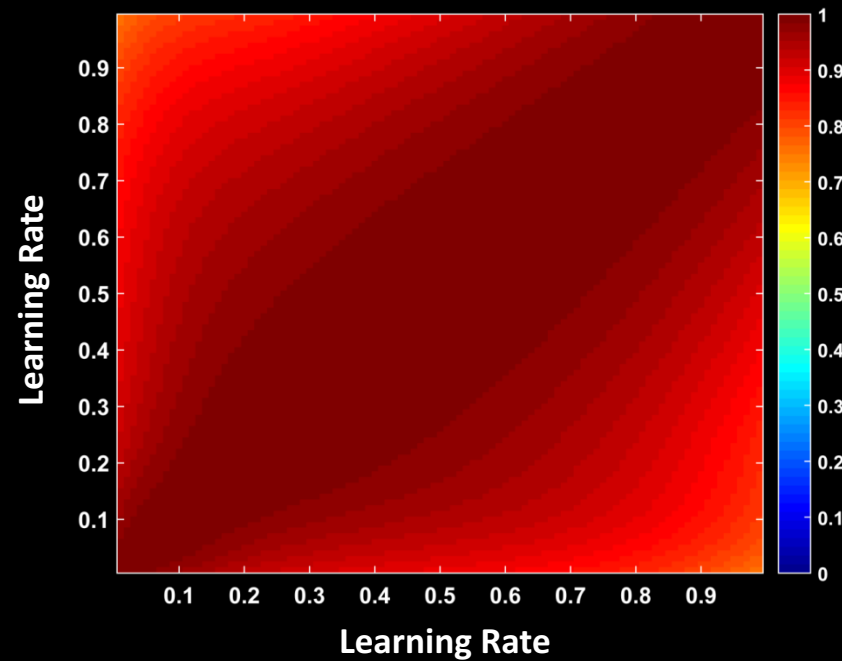

C. VTA HC PPE

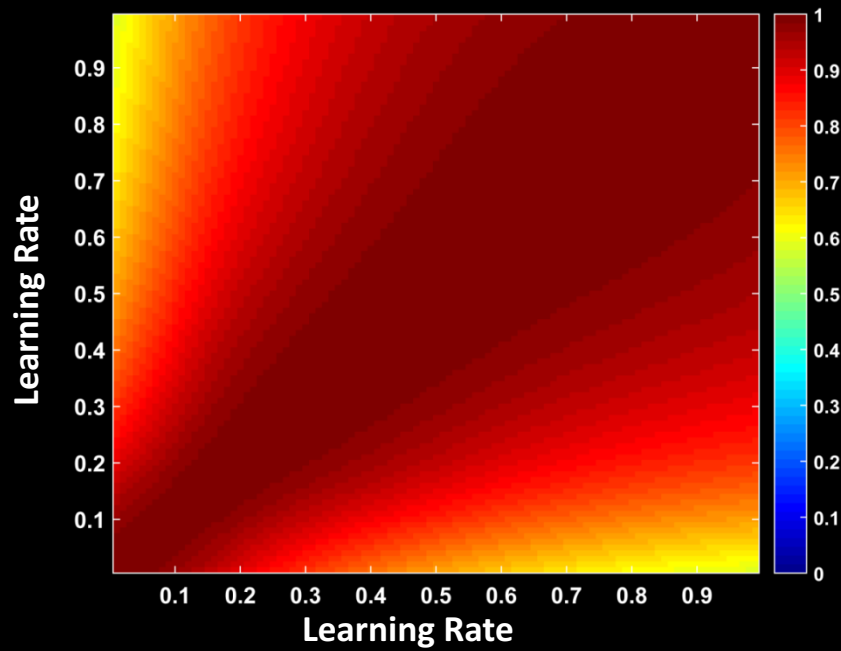

D. VTA MDD PPE

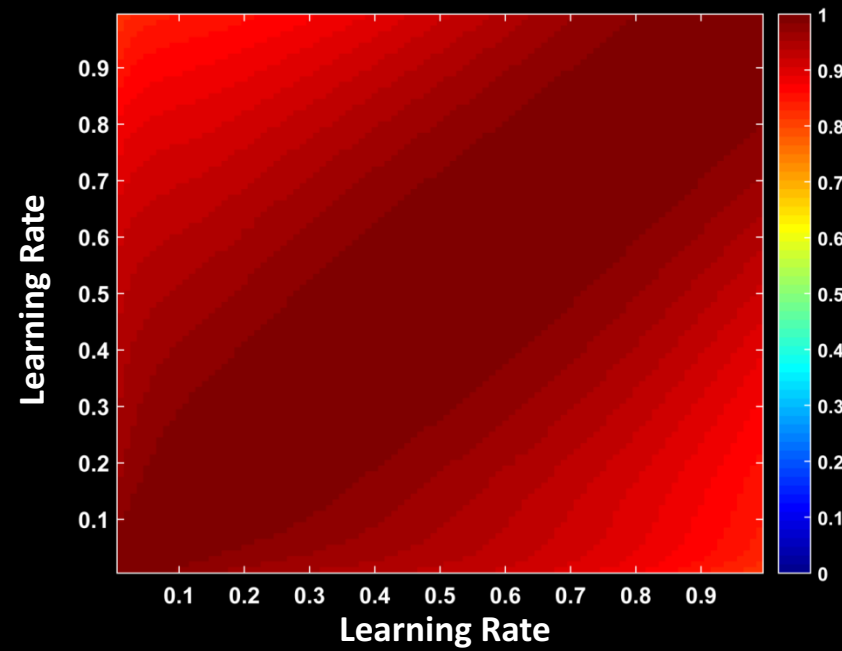

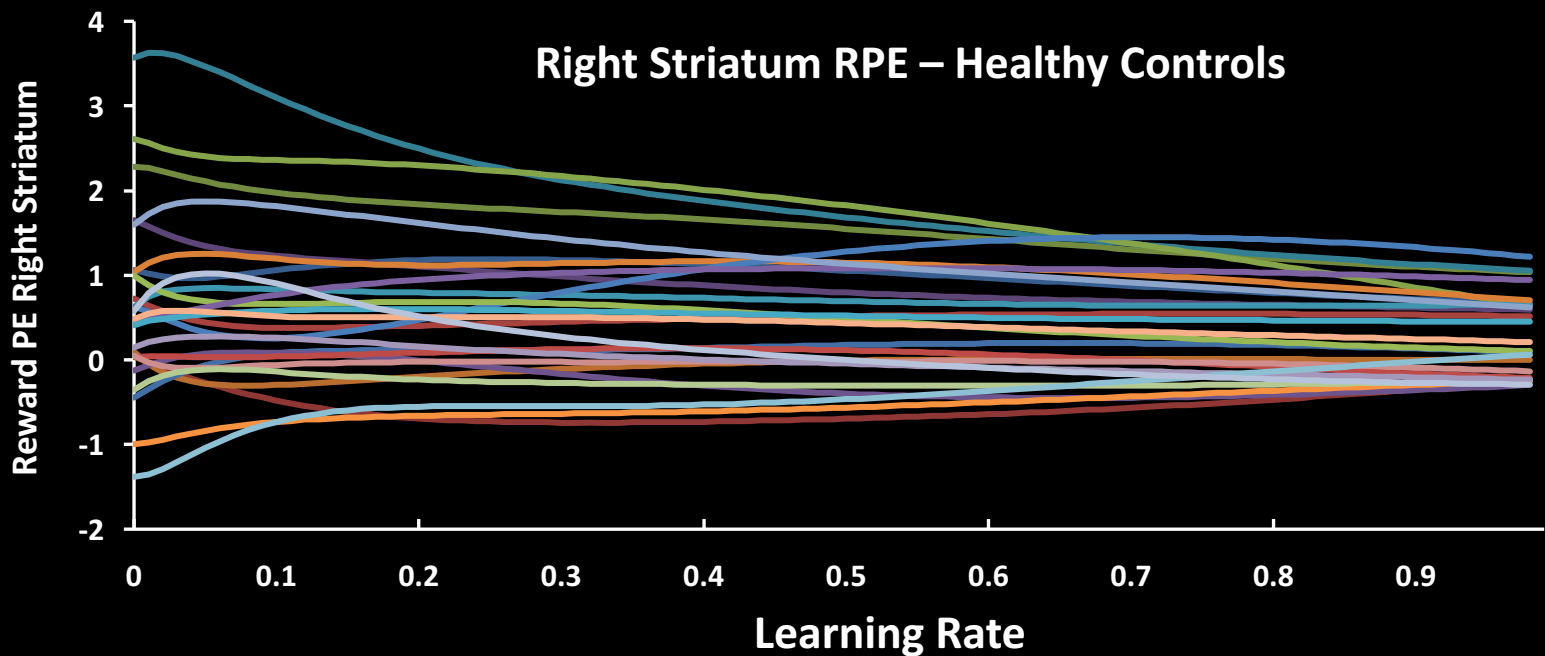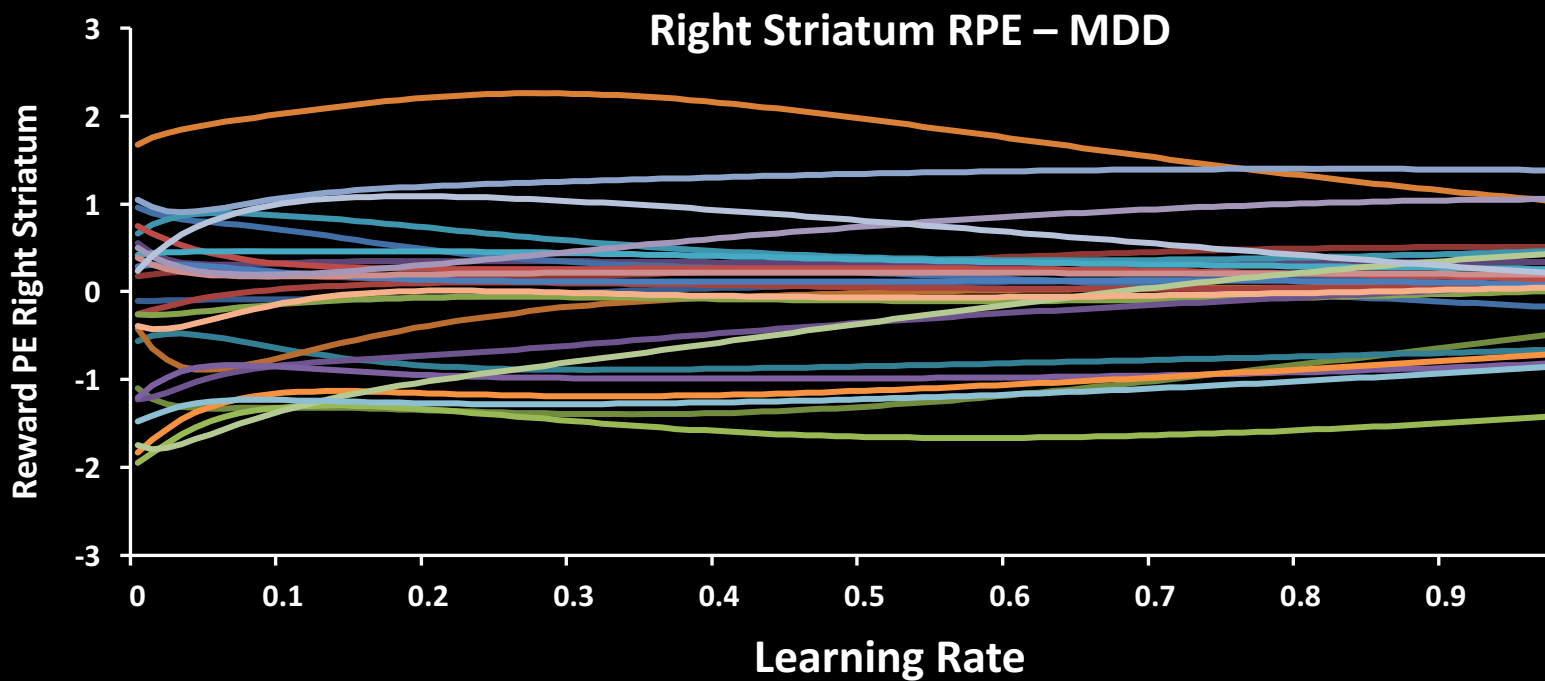

**A. Reward Prediction Error – Healthy Controls  
Individual Learning Rate**

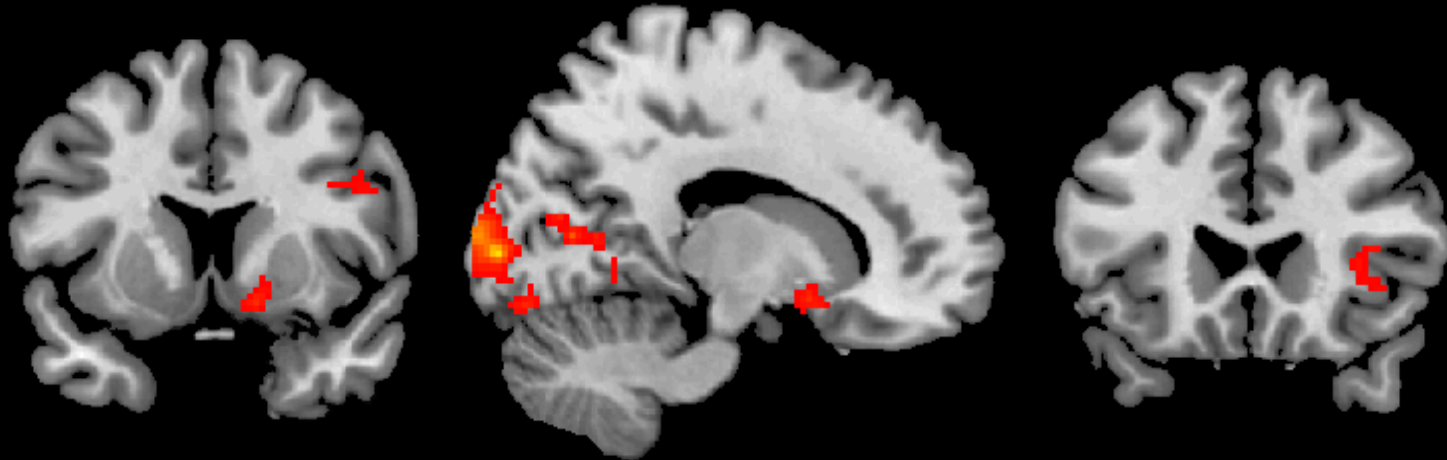

**B. Punishment Prediction Error – Healthy Controls  
Individual Learning Rate**

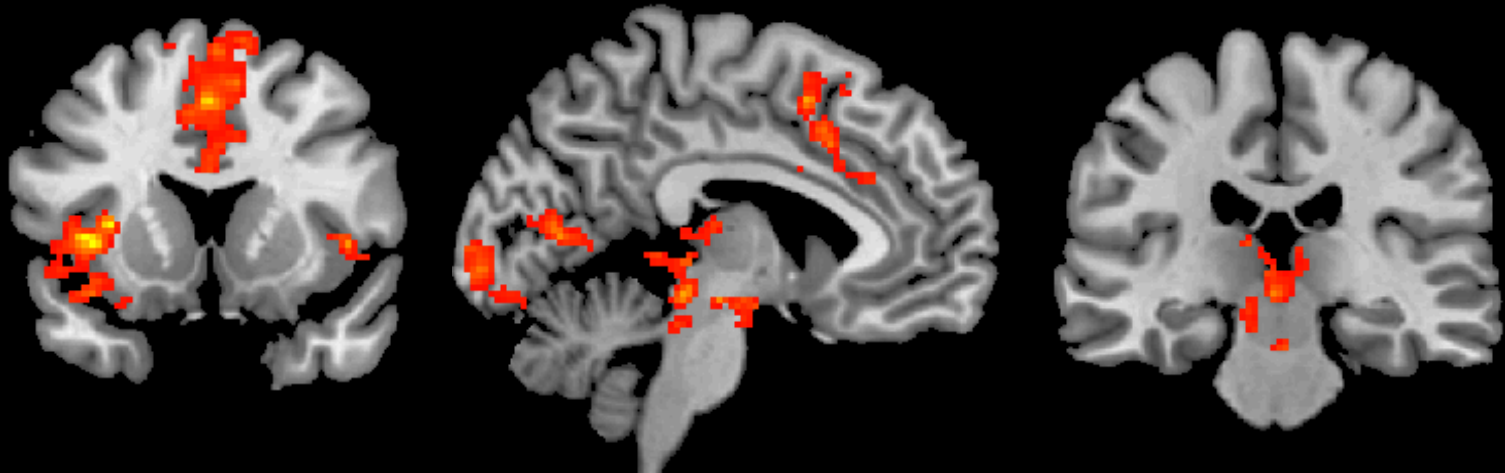

A. Reward Prediction Error

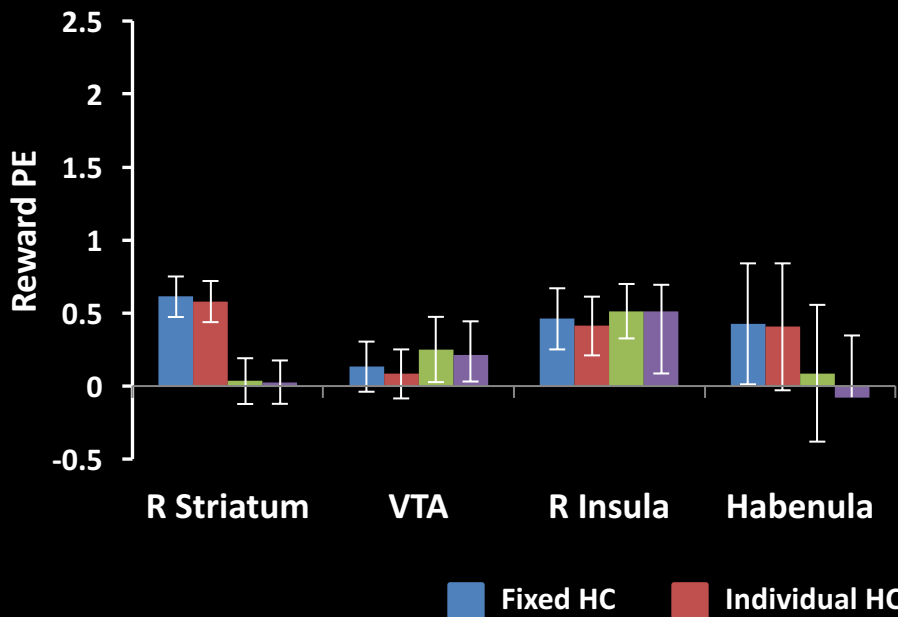

B. Punishment Prediction Error

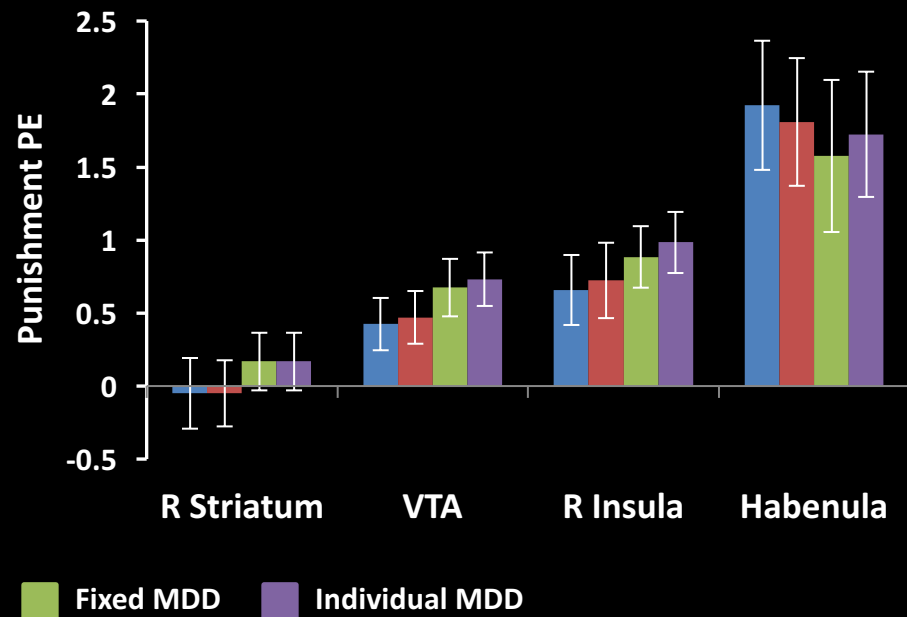

C. Reward Prediction Error

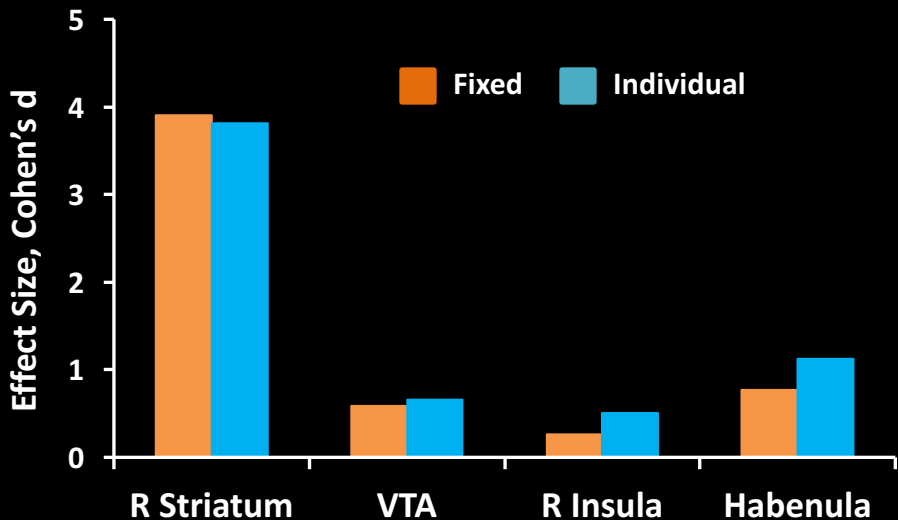

D. Punishment Prediction Error

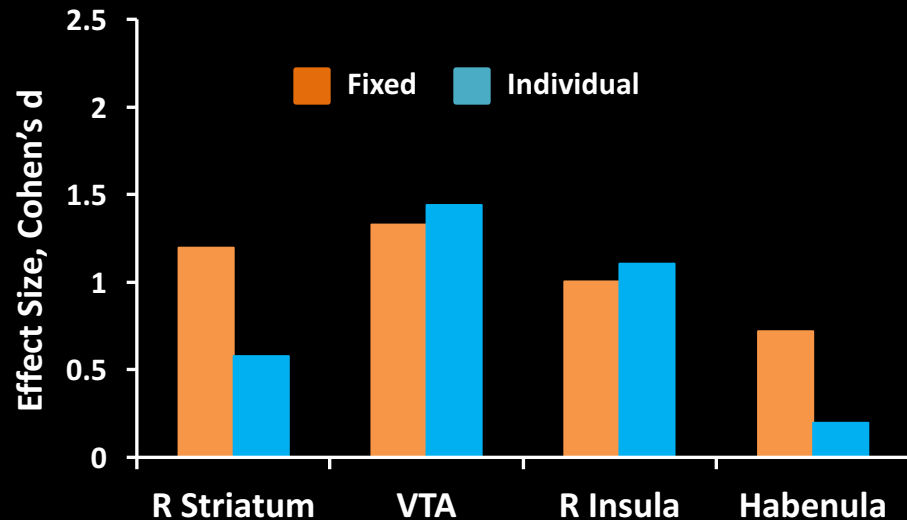

Supplement: 41386_2018_32_MOESM2_ESM.pdf [file 41386_2018_32_MOESM2_ESM.pdf]
